# Supplementary material for: Food and Nutrition Related Concerns Post Lockdown during COVID-19 Pandemic and Their Association with Dietary Behaviors
Source: MDPI journal article supplement (doi:10.3390/foods10112858), 2021-11-18
Supplement: s1 [file s1]

## 新冠疫情常态化居民膳食营养情况问卷调查

您好，我们是北京大学公共卫生学院的学生，为进一步了解此次疫情期间人们膳食多样性和饮食行为，为相关机构提供建议与参考，特进行此次调查。此问卷结果仅供研究使用，绝不会泄露您的个人信息。欢迎您转发此问卷，感谢您的支持与配合！

### 第一部分:近期食物来源以及过去24小时内摄入食物种类

#### 1.近一个星期食物来源[矩阵多选题] \*

|                                             | 家中原有                     | 前往门店或超市购买                | 网上购买                     | 政府或社区配送                  | 未食用                      |
|---------------------------------------------|--------------------------|--------------------------|--------------------------|--------------------------|--------------------------|
| a.谷物及谷物类制品（如面包、饼干、米面或其他由小米，大米，高粱，小麦等制成的食物）： | <input type="checkbox"/> |
| b.根茎和块茎类食物及其制品（南瓜、胡萝卜、红薯、马铃薯、               | <input type="checkbox"/> |

|                                                                               |                          |                          |                          |                          |                          |
|-------------------------------------------------------------------------------|--------------------------|--------------------------|--------------------------|--------------------------|--------------------------|
| 山药等)<br>：                                                                     |                          |                          |                          |                          |                          |
| c.蔬菜:                                                                         | <input type="checkbox"/> |
| d.水果:                                                                         | <input type="checkbox"/> |
| e.肉类、<br>家禽、内<br>脏（比如<br>猪肉、牛<br>肉、羊肉<br>、鸡肉等<br>以及肝脏<br>、肾脏、<br>心脏等内<br>脏肉）： | <input type="checkbox"/> |
| f.蛋类:                                                                         | <input type="checkbox"/> |
| g.鱼和海<br>鲜（新鲜<br>鱼类或鱼<br>干，贝类<br>等）：                                          | <input type="checkbox"/> |
| h.豆类及<br>制品（如<br>黄豆、豌<br>豆、扁豆<br>等及其制<br>成的食物<br>）：                           | <input type="checkbox"/> |

|                          |                          |                          |                          |                          |                          |
|--------------------------|--------------------------|--------------------------|--------------------------|--------------------------|--------------------------|
| i.牛奶和奶制品:                | <input type="checkbox"/> |
| j.油，脂肪或黄油制品:             | <input type="checkbox"/> |
| k.糖或蜂蜜:                  | <input type="checkbox"/> |
| l.其他（如速食食品，方便面等，以及代餐零食）: | <input type="checkbox"/> |

2.过去24小时内食用食物种类:[矩阵单选题] \*

|                                                |                       |                       |
|------------------------------------------------|-----------------------|-----------------------|
|                                                | 是                     | 否                     |
| 是否食用了谷物及谷物类制品（如面包、饼干、米面或其他由小米，大米，高粱，小麦等制成的食物）: | <input type="radio"/> | <input type="radio"/> |

|                                              |                       |                       |
|----------------------------------------------|-----------------------|-----------------------|
| 是否食用了根茎和块茎类食物及其制品（南瓜、胡萝卜、红薯、马铃薯、山药等）：        | <input type="radio"/> | <input type="radio"/> |
| 是否食用了蔬菜：                                     | <input type="radio"/> | <input type="radio"/> |
| 是否食用了水果：                                     | <input type="radio"/> | <input type="radio"/> |
| 是否食用了肉类、家禽、内脏（比如猪肉、牛肉、羊肉、鸡肉等以及肝脏、肾脏、心脏等内脏肉）： | <input type="radio"/> | <input type="radio"/> |
| 是否食用了蛋类：                                     | <input type="radio"/> | <input type="radio"/> |
| 是否食用了鱼和海                                     | <input type="radio"/> | <input type="radio"/> |

|                                |                       |                       |
|--------------------------------|-----------------------|-----------------------|
| 鲜（新鲜鱼类或鱼干，贝类等）：                |                       |                       |
| 是否食用了豆类及制品（如黄豆、豌豆、扁豆等及其制成的食物）： | <input type="radio"/> | <input type="radio"/> |
| 是否食用了牛奶和奶制品：                   | <input type="radio"/> | <input type="radio"/> |
| 是否食用了油，脂肪或黄油制品：                | <input type="radio"/> | <input type="radio"/> |
| 是否食用了糖或蜂蜜：                     | <input type="radio"/> | <input type="radio"/> |
| 其他（如速食食品，方便面等，以及代餐零食）：         | <input type="radio"/> | <input type="radio"/> |

3.如果您是认真作答本题请选是: [单选题] \*

☐是

☐否

## 第二部分饮食行为

4.近期平均一周运动的次数: [单选题] \*

☐A.0 (请跳至第6题)

☐B.1~3

☐C.4~6

☐D.7及以上

5.每次运动平均多长时间: [单选题] \*

☐A.30min以下

☐B.30~60min

☐C.60min以上

6.近期三餐是否规律: [单选题] \*

☐一日三餐（时间基本固定）

☐一日两餐（时间基本固定）

☐一日一餐

☐用餐次数、时间不固定

7.近期有无称量体重: [单选题] \*

☐有称量

☐想称，但家里无体重秤

☐不想称

8.您目前的身高为：\_\_\_\_\_ cm

近一个月称量的体重为：\_\_\_\_\_ kg（公斤）请填整数，若不清楚可填“999”

[填空题] \*

9.与2019年同期相比，近期您的饮食行为发生的变化：[矩阵单选题] \*

|                      | 增加                    | 减少                    | 无明显变化                 |
|----------------------|-----------------------|-----------------------|-----------------------|
| 在外就餐<br>频率           | <input type="radio"/> | <input type="radio"/> | <input type="radio"/> |
| 通过外卖<br>服务就餐<br>频率   | <input type="radio"/> | <input type="radio"/> | <input type="radio"/> |
| 在家自行<br>烹饪就餐<br>频率   | <input type="radio"/> | <input type="radio"/> | <input type="radio"/> |
| 通过农贸<br>市场购买<br>食物频率 | <input type="radio"/> | <input type="radio"/> | <input type="radio"/> |
| 网上购买<br>食品的频<br>率    | <input type="radio"/> | <input type="radio"/> | <input type="radio"/> |

|                    |                       |                       |                       |
|--------------------|-----------------------|-----------------------|-----------------------|
| 食用海鲜<br>频率         | <input type="radio"/> | <input type="radio"/> | <input type="radio"/> |
| 生食食品<br>频率         | <input type="radio"/> | <input type="radio"/> | <input type="radio"/> |
| 食用冷冻<br>保鲜食品<br>频率 | <input type="radio"/> | <input type="radio"/> | <input type="radio"/> |
| 食用进口<br>生鲜频率       | <input type="radio"/> | <input type="radio"/> | <input type="radio"/> |
| 食用零食<br>和饮料的<br>频率 | <input type="radio"/> | <input type="radio"/> | <input type="radio"/> |

10.近一个月以来，您是否注意并坚持以下行为[矩阵单选题] \*

|                      | 是                     | 否                     |
|----------------------|-----------------------|-----------------------|
| 采用分餐<br>制            | <input type="radio"/> | <input type="radio"/> |
| 使用公勺<br>公筷           | <input type="radio"/> | <input type="radio"/> |
| 烹饪时食<br>物煮熟煮<br>透    | <input type="radio"/> | <input type="radio"/> |
| 生、熟食<br>物的刀具<br>案板分开 | <input type="radio"/> | <input type="radio"/> |

11.请选择您对以下情况的担忧程度[矩阵单选题] \*



|                    | 毫不担忧                  | 轻微担忧                  | 中度担忧                  | 非常担忧                  |
|--------------------|-----------------------|-----------------------|-----------------------|-----------------------|
| 接触污染<br>食物感染<br>病毒 | <input type="radio"/> | <input type="radio"/> | <input type="radio"/> | <input type="radio"/> |
| 外出聚餐<br>感染病毒       | <input type="radio"/> | <input type="radio"/> | <input type="radio"/> | <input type="radio"/> |
| 食物供应<br>短缺         | <input type="radio"/> | <input type="radio"/> | <input type="radio"/> | <input type="radio"/> |
| 此项请选<br>“非常担<br>忧” | <input type="radio"/> | <input type="radio"/> | <input type="radio"/> | <input type="radio"/> |
| 营养过剩               | <input type="radio"/> | <input type="radio"/> | <input type="radio"/> | <input type="radio"/> |
| 营养不足               | <input type="radio"/> | <input type="radio"/> | <input type="radio"/> | <input type="radio"/> |

12.面对当前疫情形势，您是否有额外摄入以下食品/药品以抵御病毒？ [多选题] \*

☐维生素C补充剂

☐益生菌制剂

☐酒或含酒精饮品

☐醋

☐板蓝根，双黄连等

☐食疗补品、保健品

☐水果蔬菜

☐抗病毒药物

☐其他 \_\_\_\_\_ \*

☐无额外摄入

13.在当前疫情形式下，您是否增加家中食物的储备量 [单选题] \*

☐是

☐否

14.近一个月以来，您所购买食物是否有以下信息： [矩阵单选题] \*

|          | 是                     | 否                     | 未关注                   |
|----------|-----------------------|-----------------------|-----------------------|
| 质量检测合格报告 | <input type="radio"/> | <input type="radio"/> | <input type="radio"/> |
| 产地来源     | <input type="radio"/> | <input type="radio"/> | <input type="radio"/> |
| 运输过程     | <input type="radio"/> | <input type="radio"/> | <input type="radio"/> |

### 第三部分 基本信息

15.1.您现在所在的地区: [填空题] \*

---

15.2.您所在的地区属于? [单选题] \*

☐城市

☐农村

16.您的年龄为 （岁）? [单选题] \*

☐18岁以下

☐18~30岁

☐31~45岁

☐46~60岁

☐60岁以上

17.您的性别? [单选题] \*

☐男

☐女

18.您的文化程度? [单选题] \*

☐小学、初中

☐高中

☐本科

☐硕士及以上

19.您的全家年总收入 [单选题] \*

☐3万以下

☐3万-10万

☐10万-30万

☐30万-50万

☐50万-100万

☐大于100万

20.近一个月内，您每周出门的次数? [单选题] \*

☐0次

☐1-2次

☐3-4次

☐5-7次

☐大于7次

21.您家中是否有以下人群[矩阵单选题] \*

|             | 是                     | 否                     |
|-------------|-----------------------|-----------------------|
| 5岁以下<br>孩子  | <input type="radio"/> | <input type="radio"/> |
| 65岁以上<br>老人 | <input type="radio"/> | <input type="radio"/> |
| 妊娠期妇<br>女   | <input type="radio"/> | <input type="radio"/> |

22.您是否参与本课题组在三月末发放的第一轮问卷？ [单选题] \*

☐是

☐否
