# Supplementary material for: Food and Nutrition Related Concerns Post Lockdown during COVID-19 Pandemic and Their Association with Dietary Behaviors
Source: MDPI journal article supplement (doi:10.3390/foods10112858), 2021-11-18
Supplement: s1 [file s1]

## A questionnaire on the dietary and nutritional status of residents during the current COVID-19 pandemic.

Hello, we are students at the School of Public Health of Peking University. We are conducting a survey to further understand the dietary diversity and behaviors of people during the current COVID-19 pandemic, and to provide references and recommendations for relevant institutions. The results of this questionnaire are for research use only and will never reveal your personal information. You are welcome to forward and share this questionnaire and thank you for your support and cooperation!

### Section 1: recent food sources and types of food consumed within the past 24 hours

#### 1. food source in the past week [matrix multiple-choice] \*

|                                                                                                                                     | Home food storage        | In-person shopping at supermarkets | Online purchase          | Food distribution programs | Did not consume          |
|-------------------------------------------------------------------------------------------------------------------------------------|--------------------------|------------------------------------|--------------------------|----------------------------|--------------------------|
| a. Cereals and cereal products (such as bread, biscuits, rice noodles or other foods made from millet, rice, sorghum, wheat, etc.): | <input type="checkbox"/> | <input type="checkbox"/>           | <input type="checkbox"/> | <input type="checkbox"/>   | <input type="checkbox"/> |
| b. Root and tuber foods and their                                                                                                   | <input type="checkbox"/> | <input type="checkbox"/>           | <input type="checkbox"/> | <input type="checkbox"/>   | <input type="checkbox"/> |

|                                                                                                                                                                |                          |                          |                          |                          |                          |
|----------------------------------------------------------------------------------------------------------------------------------------------------------------|--------------------------|--------------------------|--------------------------|--------------------------|--------------------------|
| products<br>(pumpkin,<br>carrot, sweet<br>potato,<br>potato, yam,<br>etc.):                                                                                    |                          |                          |                          |                          |                          |
| c.<br>Vegetables:                                                                                                                                              | <input type="checkbox"/> |
| d. Fruits:                                                                                                                                                     | <input type="checkbox"/> |
| e. Meat,<br>poultry,<br>organ meat<br>(such as<br>pork, beef,<br>lamb,<br>chicken, etc.,<br>as well as<br>liver, kidney,<br>heart and<br>other organ<br>meat): | <input type="checkbox"/> |
| f. Eggs:                                                                                                                                                       | <input type="checkbox"/> |
| g. Fish and<br>seafood<br>(fresh fish or<br>dried fish,<br>shellfish,<br>etc.):                                                                                | <input type="checkbox"/> |

|                                                                                           |                          |                          |                          |                          |                          |
|-------------------------------------------------------------------------------------------|--------------------------|--------------------------|--------------------------|--------------------------|--------------------------|
| h. Beans and products<br>(Such as soybeans, peas, lentils and foods made from them etc.): | <input type="checkbox"/> |
| i. Milk and dairy products:                                                               | <input type="checkbox"/> |
| j. Oil, fat or butter and their products:                                                 | <input type="checkbox"/> |
| k. Sugar or honey:                                                                        | <input type="checkbox"/> |
| l. Other (such as instant food, instant noodles, snack and meal replacement)<br>:         | <input type="checkbox"/> |

2. Types of food consumed in the past 24 hours: [multiple choice matrix] \*

|  |     |    |
|--|-----|----|
|  | Yes | No |
|--|-----|----|

|                                                                                                                                                     |                       |                       |
|-----------------------------------------------------------------------------------------------------------------------------------------------------|-----------------------|-----------------------|
| a. did you consume cereals and cereal products (such as bread, biscuits, rice noodles or other foods made from millet, rice, sorghum, wheat, etc.): | <input type="radio"/> | <input type="radio"/> |
| b. did you consume root and tuber foods and their products (pumpkin, carrot, sweet potato, potato, yam, etc.):                                      | <input type="radio"/> | <input type="radio"/> |
| c. did you consume any vegetables:                                                                                                                  | <input type="radio"/> | <input type="radio"/> |

|                                                                                                                               |                       |                       |
|-------------------------------------------------------------------------------------------------------------------------------|-----------------------|-----------------------|
| d. did you consume fruits:                                                                                                    | <input type="radio"/> | <input type="radio"/> |
| e. Meat, poultry, organ meat (such as pork, beef, lamb, chicken, etc., as well as liver, kidney, heart and other organ meat): | <input type="radio"/> | <input type="radio"/> |
| f. did you consume eggs:                                                                                                      | <input type="radio"/> | <input type="radio"/> |
| g. did you consume fish and seafood (fresh fish or dried fish, shellfish, etc.):                                              | <input type="radio"/> | <input type="radio"/> |
| h. did you consume beans and products                                                                                         | <input type="radio"/> | <input type="radio"/> |

|                                                                                       |   |   |
|---------------------------------------------------------------------------------------|---|---|
| (Such as soybeans, peas, lentils and foods made from them etc.):                      |   |   |
| i. did you consume milk and dairy products:                                           | ○ | ○ |
| j. did you consume oil, fat or butter and their products:                             | ○ | ○ |
| k. did you consume sugar or honey:                                                    | ○ | ○ |
| l. did you consume other foods (such as instant food, instant noodles, snack and meal | ○ | ○ |

|                   |  |  |
|-------------------|--|--|
| replacement)<br>: |  |  |
|-------------------|--|--|

3. If you are serious about answering this question, please choose yes: [single-choice question] \*

- ☐ yes
- ☐ no

## Section 2: eating behaviors

4. Recently, on average, how many times you have performed any physical activities in a week? [single-choice question] \*

- ☐ A.0 (please skip to question 6)
- ☐ B.1~3
- ☐ C.4~6
- ☐ D.7 and above

5. What is the average duration (in minutes) each time you exercise? [single choice] \*

- ☐ A. 30min or less
- ☐ B.30~60min
- ☐ C.60min or more

6. How regular your meals have been recently? [multiple choice] \*

- ☐ Three meals a day (mostly fixed time)
- ☐ Two meals a day (mostly fixed time)

- One meal a day (mostly fixed time)
- No fixed meal frequency and time

7. Have you weighed yourself recently? [Single-choice question] \*

- Yes
- Want to but no scale available at home
- No, do not want to weigh

8. Your current height is: \_\_\_\_\_ cm

Your weight in the past month is: \_\_\_\_\_ kg (kilograms) [fill in the blank] \*

Please use integers.

If not known, please fill in "999"

9. compared with the same period in 2019, please report any recent changes in your eating behaviors: [matrix multiple choice] \*

|                                           | increase | decrease | no significant change |
|-------------------------------------------|----------|----------|-----------------------|
| Frequency of eating out                   | ○        | ○        | ○                     |
| Frequency of ordering takeout or delivery | ○        | ○        | ○                     |

|                                                                |   |   |   |
|----------------------------------------------------------------|---|---|---|
| Frequency<br>of<br>cooking<br>and eating<br>at home            | ○ | ○ | ○ |
| Frequency<br>of buying<br>food at<br>the<br>farmer's<br>market | ○ | ○ | ○ |
| Frequency<br>of buying<br>food<br>online                       | ○ | ○ | ○ |
| Frequency<br>of eating<br>seafood                              | ○ | ○ | ○ |
| Frequency<br>of eating<br>raw foods                            | ○ | ○ | ○ |
| Frequency<br>of eating<br>frozen<br>foods                      | ○ | ○ | ○ |
| Frequency<br>of eating                                         | ○ | ○ | ○ |

|                                                  |                       |                       |                       |
|--------------------------------------------------|-----------------------|-----------------------|-----------------------|
| imported<br>foods                                |                       |                       |                       |
| Frequency<br>of<br>snacking<br>and<br>drinking f | <input type="radio"/> | <input type="radio"/> | <input type="radio"/> |

10. In the recent month, have you paid attention and adhered to the following behaviors:  
[matrix multiple choice] \*

|                                                                     | Yes                   | No                        |
|---------------------------------------------------------------------|-----------------------|---------------------------|
| Eating from<br>individual<br>plates                                 | <input type="radio"/> | <input type="radio"/>     |
| Using public<br>chopsticks                                          | <input type="radio"/> | <input type="radio"/> The |
| Cooking foods<br>thoroughly                                         | <input type="radio"/> | <input type="radio"/>     |
| Separating<br>plates and<br>utensils for<br>raw and<br>cooked foods | <input type="radio"/> | <input type="radio"/>     |

11. Please select the level of your worries about the following situations [matrix single-choice question] \*

|  | not at all<br>concerned | slight concerned | Moderately<br>concerned | Extremely<br>concerned |
|--|-------------------------|------------------|-------------------------|------------------------|
|--|-------------------------|------------------|-------------------------|------------------------|

|                                                                |                       |                       |                       |                       |
|----------------------------------------------------------------|-----------------------|-----------------------|-----------------------|-----------------------|
| contracting<br>coronavirus<br>through<br>contaminated<br>foods | <input type="radio"/> | <input type="radio"/> | <input type="radio"/> | <input type="radio"/> |
| contracting<br>coronavirus<br>when 120<br>dining out           | <input type="radio"/> | <input type="radio"/> | <input type="radio"/> | <input type="radio"/> |
| Shortage of<br>food supply                                     | <input type="radio"/> | <input type="radio"/> | <input type="radio"/> | <input type="radio"/> |
| Please select<br>"extremely<br>concerned" for<br>this item     | <input type="radio"/> | <input type="radio"/> | <input type="radio"/> | <input type="radio"/> |
| Overnutrition                                                  | <input type="radio"/> | <input type="radio"/> | <input type="radio"/> | <input type="radio"/> |
| Undernutrition                                                 | <input type="radio"/> | <input type="radio"/> | <input type="radio"/> | <input type="radio"/> |

12. During the current pandemic, have you consumed more of the following foods/medicines to protect against the virus? [Multi-choice questions] \*

- ☐ Vitamin C supplements
- ☐ Probiotics
- ☐ Alcohol or alcoholic beverages
- ☐ Vinegar
- ☐ Banlangen, Shuanghuanglian etc.
- ☐ Dietary supplements or health care products

☐Fruits and vegetables

☐Antiviral drugs

☐Other \_\_\_\_\_ \*

☐No additional Intake

13. During the current pandemic, have you increased the amount of food storage at home? [single choice] \*

☐Yes

☐No

14. In the past month, did the foods that you purchased display any of the following information: [Matrix single-choice question] \*

|                           | Yes                                         | No                    | No issue              |
|---------------------------|---------------------------------------------|-----------------------|-----------------------|
| Quality inspection report | <input type="radio"/>                       | <input type="radio"/> | <input type="radio"/> |
| Origin                    | <input type="radio"/>                       | <input type="radio"/> | <input type="radio"/> |
| Transportation            | <input type="radio"/> <input type="radio"/> |                       | <input type="radio"/> |

### Section 3: basic demographic information

15.1 where are you currently located?(equivalent to county level residence): [fill in the blank] \*

\_\_\_\_\_

15.2 this location is: Multiple-choice questions] \*

☐urban

☐rural

16. What is your age (in years)? [Single-choice questions] \*

☐under 18 years old

☐18-30 years old

☐31~45 years old

☐46~60 years old

☐over 60 years old

17. Your gender? [single-choice question] \*

☐male

☐female

18. What is your education level? [single-choice question] \*

☐ elementary school or junior high school

☐ high school

☐ bachelor's degree

☐ master's degree and above

19. What is your annual household income (in Chinese Yuan)? [single choice title] \*

☐ 30 thousand or less

☐ 30 to 100 thousand

☐ 100 to 300 thousand

- 300 to 500 thousand
- 500 thousand to 1 million
- more than 1 million

20. **in the past month, how many times did you go outside?** [ Multiple choice] \*

- 0 times
- 1-2 times
- 3-4 times
- 5-7 times
- more than 7 times

21. In your household, are there any: [matrix multiple choice] \*

|                                | Yes | No |
|--------------------------------|-----|----|
| children<br>under 5<br>years   | ○   | ○  |
| people<br>over 65<br>years old | ○   | ○  |
| pregnant<br>women              | ○   | ○  |

22. Did you participate in the first round of survey distributed by this research group at the end of March 2020? [Single-choice question] \*

- Yes

oNo
